# Supplementary material for: Isothermal DNA amplification coupled to Au-nanoprobes for detection of mutations associated to Rifampicin resistance in Mycobacterium tuberculosis
Source: PubMed Central journal article supplement (PMC4222569; doi:10.1186/1477-3155-11-38), 2013-11-25
Supplement: 1477-3155-11-38-S1.pdf [file 1477-3155-11-38-S1.pdf]

**LAMP coupled to Au-nanoprobes for detection of mutations associated to Rifampicin resistance in *Mycobacterium tuberculosis***

Bruno Veigas<sup>1,2,†</sup>, Pedro Pedrosa<sup>1,†</sup>, Isabel Couto<sup>3,4</sup>, Miguel Viveiros<sup>3,5</sup>, Pedro V. Baptista<sup>1,\*</sup>

<sup>1</sup>CIGMH, Departamento de Ciências da Vida, Faculdade de Ciências e Tecnologia, Universidade Nova de Lisboa, Caparica, Portugal

<sup>2</sup>CENIMAT/I3N, Departamento de Ciência dos Materiais, Faculdade de Ciências e Tecnologia, Universidade Nova de Lisboa, Caparica, Portugal

<sup>3</sup>Grupo de Micobactérias, Unidade Microbiologia Médica, Universidade Nova de Lisboa (IHMT/UNL), Portugal

<sup>4</sup>CREM, Centro de Recursos Microbiológicos, Universidade Nova de Lisboa, Portugal

<sup>5</sup>Centro de Malária e Outras Doenças Tropicais, Instituto de Higiene e Medicina Tropical, Universidade Nova de Lisboa (IHMT/UNL), Portugal

† Both authors contributed equally for this work

\* Corresponding author: [Nanotheranostics@CIGMH](mailto:Nanotheranostics@CIGMH), Departamento de Ciências da Vida, Faculdade de Ciências e Tecnologia, Universidade Nova de Lisboa, Campus de Caparica, 2829-516 Caparica, Portugal; Phone/Fax: +351 21 2948530; Email: [pmvb@fct.unl.pt](mailto:pmvb@fct.unl.pt)

### Au-nanoparticles Characterization

Au-nanoparticles were characterized by Transmission Electron Microscopy (TEM) analysis. Ten images were taken in a total of 386 particles analyzed and the mean diameter of ~13.9 nm determined using Carnoy 2.0.

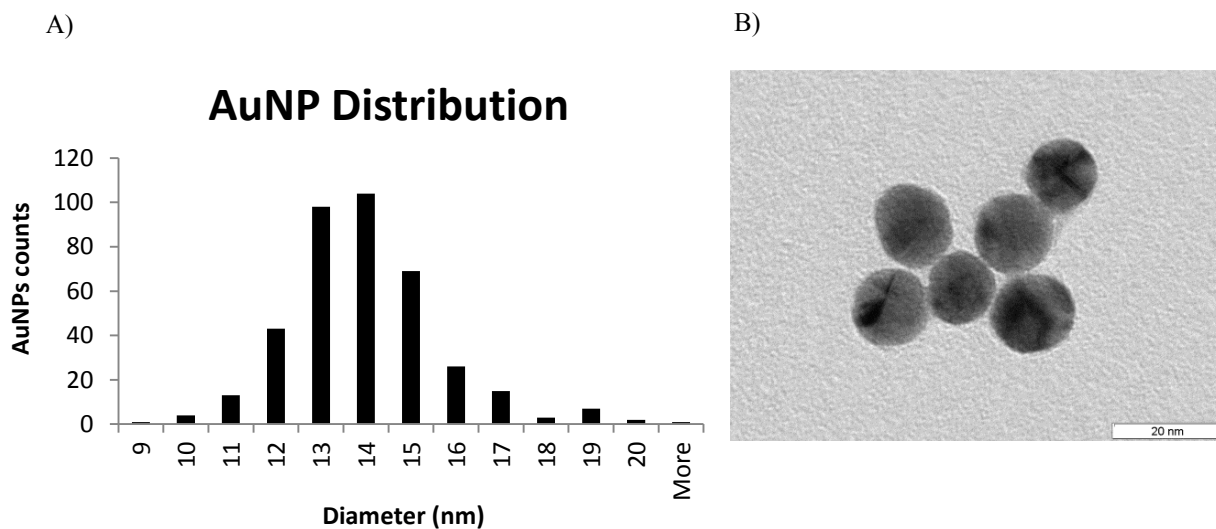

**Figure S1. Size and shape of the synthesized AuNPs.** (A) histogram of analyzed particles by measured diameter, with a mean diameter of 13.9 nm ( $\pm$  1.7 nm), (B) TEM picture of spherical nanoparticles with approximate 14 nm diameter size.

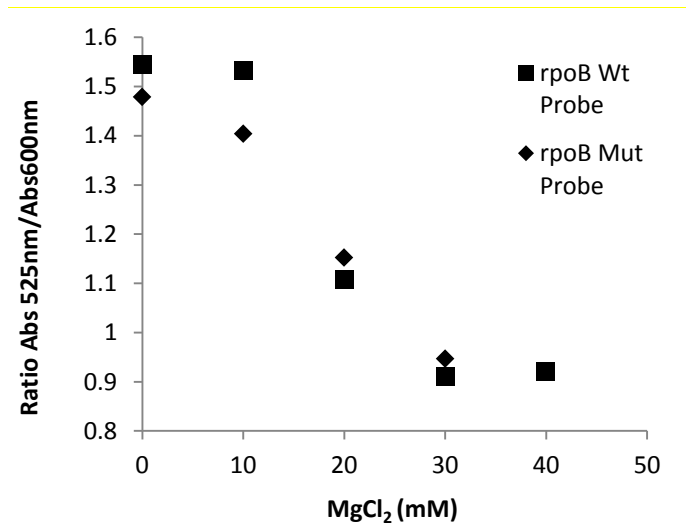

**Figure S2. Aggregation profiles of the synthesized Au-nanoprobes.** Aggregation measured as the ratio of localized surface plasmon resonance intensity at 525 nm and 600 nm for increasing salt concentrations ( $\text{MgCl}_2$ ). The minimum amount of salt required to cause aggregation was determined based on each Au-nanoprobe aggregation profiles. Ratios  $<1$  were considered for full aggregation. Determined concentrations for full aggregation: *rpoB* Wt probe, 30mM; *rpoB* Mut probe 30mM.

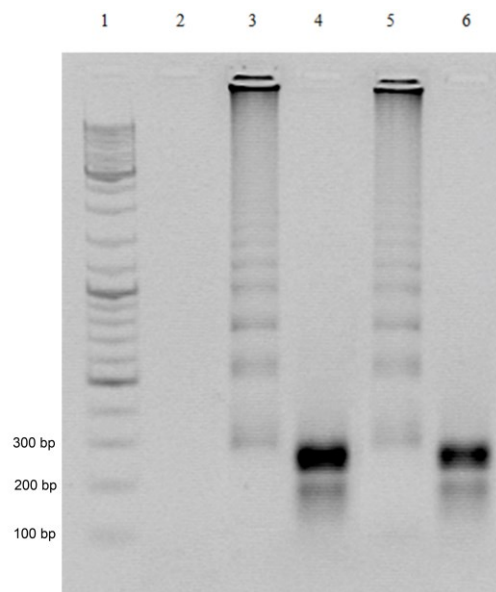

**Figure S3. Agarose gel electrophoresis analysis of LAMP products.** Electrophoretic analysis in 1% agarose gel of LAMP products (Lane 3 and 5) and digested products with *ApaI* (Lane 4 and 6). Lane 1: Thermo Scientific GeneRuler DNA Ladder Mix (100-10,000 bp)

**Table S4. Discrimination of mutations**

| <b>Sample</b> | <b>Ratio WT/Mut</b> | <b><i>rpoB</i> S531L<br/>Genotype</b> |
|---------------|---------------------|---------------------------------------|
| 1             | 1.11                | -                                     |
| 2             | 1.11                | -                                     |
| 3             | 1.08                | -                                     |
| 4             | 1.14                | -                                     |
| 5             | 1.01                | -                                     |
| 6             | 1.09                | -                                     |
| 7             | 0.90                | +                                     |
| 8             | 0.92                | +                                     |
| 9             | 0.93                | +                                     |
| 10            | 0.91                | +                                     |
| 11            | 0.93                | +                                     |
| 12            | 0.93                | +                                     |

Note: A ratio between spectral data results for each probe was calculated [ $WT_{Abs525nm}/Abs600nm$  /  $Mut_{Abs525nm}/Abs600nm$ ]. Values >1 mean higher stability of WT probes, and <1 higher stability of Mut probes. Mutated genotypes (+) and wild type (-)
